# Supplementary material for: Novel Identification of the Collection of Pathogenic Fungal Species Verticillium with the Development of Species-Specific SSR Markers
Source: MDPI journal article supplement (doi:10.3390/pathogens12040535), 2023-03-29
Supplement: s1 [file s1]

Supplementary Table S3: Diversity by species

| Species               |      | Na   | N     | Ne   | I    | h    | uh   |
|-----------------------|------|------|-------|------|------|------|------|
| <i>V. nonalfalfae</i> |      | 29   |       |      |      |      |      |
|                       | Mean | 2.90 | 49.70 | 1.11 | 0.22 | 0.09 | 0.09 |
|                       | SE   | 0.31 | 0.21  | 0.03 | 0.04 | 0.02 | 0.02 |
| <i>V. alfalfae</i>    |      | 21   |       |      |      |      |      |
|                       | Mean | 2.10 | 5.00  | 2.01 | 0.71 | 0.50 | 0.62 |
|                       | SE   | 0.10 | 0.00  | 0.09 | 0.04 | 0.02 | 0.02 |
| <i>V. dahliae</i>     |      | 27   |       |      |      |      |      |
|                       | Mean | 2.70 | 19.90 | 1.41 | 0.43 | 0.22 | 0.23 |
|                       | SE   | 0.42 | 0.62  | 0.17 | 0.12 | 0.06 | 0.07 |

Na = No. of different alleles

N = Size of population

Ne = No. of effective alleles =  $1 / (\sum p_i^2)$

I = Shannon's Information Index =  $-1 * \sum (p_i * \ln(p_i))$

h = Diversity =  $1 - \sum p_i^2$

uh = Unbiased Diversity =  $(N / (N-1)) * h$

(Where  $p_i$  is the frequency of the  $i$ th allele for the population &  $\sum p_i^2$  is the sum of the squared population allele frequencies.)
