# Supplementary material for: Novel Identification of the Collection of Pathogenic Fungal Species Verticillium with the Development of Species-Specific SSR Markers
Source: MDPI journal article supplement (doi:10.3390/pathogens12040535), 2023-03-29
Supplement: s1 [file s1]

**Supplementary Table S1:** Designed and used LAMP primers for *V. nonalfalfae*/*V. dahliae* species differentiation

| Name       | LAMP region | Sequence                                    | Species               |
|------------|-------------|---------------------------------------------|-----------------------|
| Vnaa-Vd1_1 | F3          | GCGTCCAGAGACTACAGCT                         | <i>V. nonalfalfae</i> |
|            | B3          | AGCGGCAGATGAAATAGGTT                        |                       |
|            | FIP         | GATTCAAGGGCATGCACCGC-GCCAGATATCTGGGCAGC     |                       |
|            | BIP         | TGCACATCAGGAGTTCAGGCAC-GCCAAGTTCTTTGGTGAGCT |                       |
|            | F2          | GCCAGATATCTGGGCAGC                          |                       |
|            | F1c         | GATTCAAGGGCATGCACCGC                        |                       |
|            | B2          | GCCAAGTTCTTTGGTGAGCT                        |                       |
|            | B1c         | TGCACATCAGGAGTTCAGGCAC                      |                       |
|            | LoopF       | CACTTGCAAAGCCTGTATTTTCG                     |                       |
|            | LoopB       | GCTTTCCGGGTTATCCTTG GTT                     |                       |
| Vnaa-Vd1_2 | F3          | GCCGAAATACAGGCTTTGC                         | <i>V. nonalfalfae</i> |
|            | B3          | CCAACCAGCGATGTCACAAT                        |                       |
|            | FIP         | GTGCCTGAACTCCTGATGTGCA-GGTGCATGCCCTTGAATCC  |                       |
|            | BIP         | ATTTCATCTGCCGCTCAGCGT-ACCCGACGTACGATAGAGG   |                       |
|            | F2          | GGTGCATGCCCTTGAATCC                         |                       |
|            | F1c         | GTGCCTGAACTCCTGATGTGCA                      |                       |
|            | B2          | ACCCGACGTACGATAGAGG                         |                       |
|            | B1c         | ATTTCATCTGCCGCTCAGCGT                       |                       |
| Vnaa-Vd2   | F3          | TTCCTCCCATACGGGCAG                          | <i>V. nonalfalfae</i> |
|            | B3          | GGTGATACGCACCGAACAC                         |                       |
|            | FIP         | CTCCGCAGGCAAAGAAGCGT-GAATGAGCCATGTAGCCGAA   |                       |
|            | BIP         | CGGTTGCGAAACACCAATCCC-GCGGTCAGGGTTTAATTCTGA |                       |
|            | F2          | GAATGAGCCATgTAGCCGAA                        |                       |
|            | F1c         | CTCCGCAGGCAAAGAAGCGT                        |                       |
|            | B2          | GCGGTCAGGGTTTAATTCTGA                       |                       |
|            | B1c         | CGGTTGCGAAACACCAATCCC                       |                       |
|            | LoopF       | GTGCGCATCTACATGGATGG                        |                       |
|            | LoopB       | GAAGGAAGCAATCTCAGGATACTG                    |                       |

| Name      | LAMP region | Sequence                                             | Species                                 |
|-----------|-------------|------------------------------------------------------|-----------------------------------------|
| Vnaa-Vd3  | F3          | TCAGAGCGAGGGATGTGC                                   | <i>V. nonalfalfae</i>                   |
|           | B3          | CCCTTTGCTGCAGTGGTATG                                 |                                         |
|           | FIP         | GTATGAAAGGGCTGCGAGGGG-CAGGTGATATCCGCAGTCAA           |                                         |
|           | BIP         | ATCAACTCCCCATGGGTGGC-TTCATCCACGGGGGCATT              |                                         |
|           | F2          | CAGGTGATATCCGCAGTCAA                                 |                                         |
|           | F1c         | GTATGAAAGGGCTGCGAGGGG                                |                                         |
|           | B2          | TTCATCCACGGGGGCATT                                   |                                         |
|           | B1c         | ATCAACTCCCCATGGGTGGC                                 |                                         |
|           | LoopF       | GCATTCCAATCTCCTacCTAACAC                             |                                         |
|           | LoopB       | CTCTGCAGTGAACTCCAATCA                                |                                         |
| PG2_1     | F3          | CGAATCACGGAGACTGAGAC                                 | letalna oblika<br><i>V. nonalfalfae</i> |
|           | B3          | ACTTTAATCGCCCCGTCTG                                  |                                         |
|           | FIP         | CATGGGGCCATGGAAGCACG-TGGATGTCGGGCAGAGTT              |                                         |
|           | BIP         | GCGCAGGCTAGGCGTTCTTT-CAGCCAGTATGCGAACCAAT            |                                         |
|           | F2          | TGGATGTCGGGCAGAGTT                                   |                                         |
|           | F1c         | CATGGGGCCATGGAAGCACG                                 |                                         |
|           | B2          | CAGCCAGTATGCGAACCAAT                                 |                                         |
|           | B1c         | GCGCAGGCTAGGCGTTCTTT                                 |                                         |
|           | LoopF       | GACTAAGCCGTCGCAGGT                                   |                                         |
|           | LoopB       | CACTCGCGAGAAGCCAGGA                                  |                                         |
| PG2_2     | F3          | TCGAGCGCTTTCTATCCTCA                                 | letalna oblika<br><i>V. nonalfalfae</i> |
|           | B3          | TGTTGAACGGATGCAGATCG                                 |                                         |
|           | FIP         | TGGTCCCATCGGGGCAATACAT-CTCATCCACAACAGGGGC            |                                         |
|           | BIP         | TATGTCCGAGAGATGCAGCAGC-GATGACGACGAGCAACCTC           |                                         |
|           | F2          | CTCATCCACAACAGGGGC                                   |                                         |
|           | F1c         | TGGTCCCATCGGGGCAATACAT                               |                                         |
|           | B2          | GATGACGACGAGCAACCTC                                  |                                         |
|           | B1c         | TATGTCCGAGAGATGCAGCAGC                               |                                         |
|           | LoopF       | GGTCAATGGTTGGGTATCACC                                |                                         |
|           | LoopB       | GAGTGATTGGTGGATGGAAATGC                              |                                         |
| Vd-mitoh. | F3          | ACTCTTCGAATTCTCTCTTCT                                | <i>V. dahliae</i>                       |
|           | B3          | GTTTAAGTGAGCATACTGTCAT                               |                                         |
|           | FIP         | TAGAGAGATTTCGACGTTACGAGAAT-TATTTGGGTAAGTATAGTAATGAGG |                                         |
|           | BIP         | TACTCTTGTCCCTTAAAATTTTCGCT-AGTTACTACCTTAAATAAGGAAACG |                                         |
|           | F2          | TATTTGGGTAAGTATAGTAATGAGG                            |                                         |
|           | F1c         | TAGAGAGATTTCGACGTTACGAGAAT                           |                                         |
|           | B2          | AGTTACTACCTTAAATAAGGAAACG                            |                                         |
|           | B1c         | TACTCTTGTCCCTTAAAATTTTCGCT                           |                                         |

| Name        | LAMP region | Sequence                                       | Species               |
|-------------|-------------|------------------------------------------------|-----------------------|
| Vnaa-mitoh. | F3          | GTATCTGTATAGAATTCTACACTCA                      | <i>V. nonalfalfae</i> |
|             | B3          | GAGTTAATGTAACATTCTTCCCA                        |                       |
|             | FIP         | AGTGTTGTAGCTGCTTGATTATTCT-TTCAAGGATTTCTGCTTGCA |                       |
|             | BIP         | GTTTCAACCTGCGTAAGCGT-GGATTACAAGGAATGCCTAGA     |                       |
|             | F2          | TTCAAGGATTTCTGCTTGCA                           |                       |
|             | F1c         | AGTGTTGTAGCTGCTTGATTATTCT                      |                       |
|             | B2          | GGATTACAAGGAATGCCTAGA                          |                       |
|             | B1c         | GTTTCAACCTGCGTAAGCGT                           |                       |
| 12_1_Chr2   | F3          | CGTCCAAATGACTGTGCTCA                           | <i>V. nonalfalfae</i> |
|             | B3          | AGGGTTGATGGGGAAGGAG                            |                       |
|             | FIP         | CGGCGCTCATCGACAGTCTC-GACACATCTCTCGGGACCA       |                       |
|             | BIP         | TGACCTATTGCCCCGAAACTCC-CCCCATATCCGACATGATCC    |                       |
|             | F2          | GACACATCTCTCGGGACCA                            |                       |
|             | F1c         | CGGCGCTCATCGACAGTCTC                           |                       |
|             | B2          | CCCCATATCCGACATGATCC                           |                       |
|             | B1c         | TGACCTATTGCCCCGAAACTCC                         |                       |
|             | LoopF       | GCTGTGCTTGACCAGGAGC                            |                       |
|             | LoopB       | TTCAAAAGCCAAGGAACTACATGG                       |                       |
| 14Chr3      | F3          | TCCCGTCGCAAGATACCG                             | <i>V. nonalfalfae</i> |
|             | B3          | ACTCGAGTTCGTAGCTCAGG                           |                       |
|             | FIP         | TTCCGACCTCTCAGCGCTCG-GCGCCCTTCCATTCCCTA        |                       |
|             | BIP         | GAGACCGACGCGGCAAAGAT-CCCTCAATGACAATGTCCCG      |                       |
|             | F2          | GCGCCCTTCCATTCCCTA                             |                       |
|             | F1c         | TTCCGACCTCTCAGCGCTCG                           |                       |
|             | B2          | CCCTCAATGACAATGTCCCG                           |                       |
|             | B1c         | GAGACCGACGCGGCAAAGAT                           |                       |
|             | LoopF       | GCTTTGAGCTGTGGCTTCC                            |                       |
|             | LoopB       | TTCAAAAGCCAAGGAACTACATGG                       |                       |
