# Supplementary figures and images for: Novel Identification of the Collection of Pathogenic Fungal Species Verticillium with the Development of Species-Specific SSR Markers
Source: MDPI journal article supplement (doi:10.3390/pathogens12040535), 2023-03-29

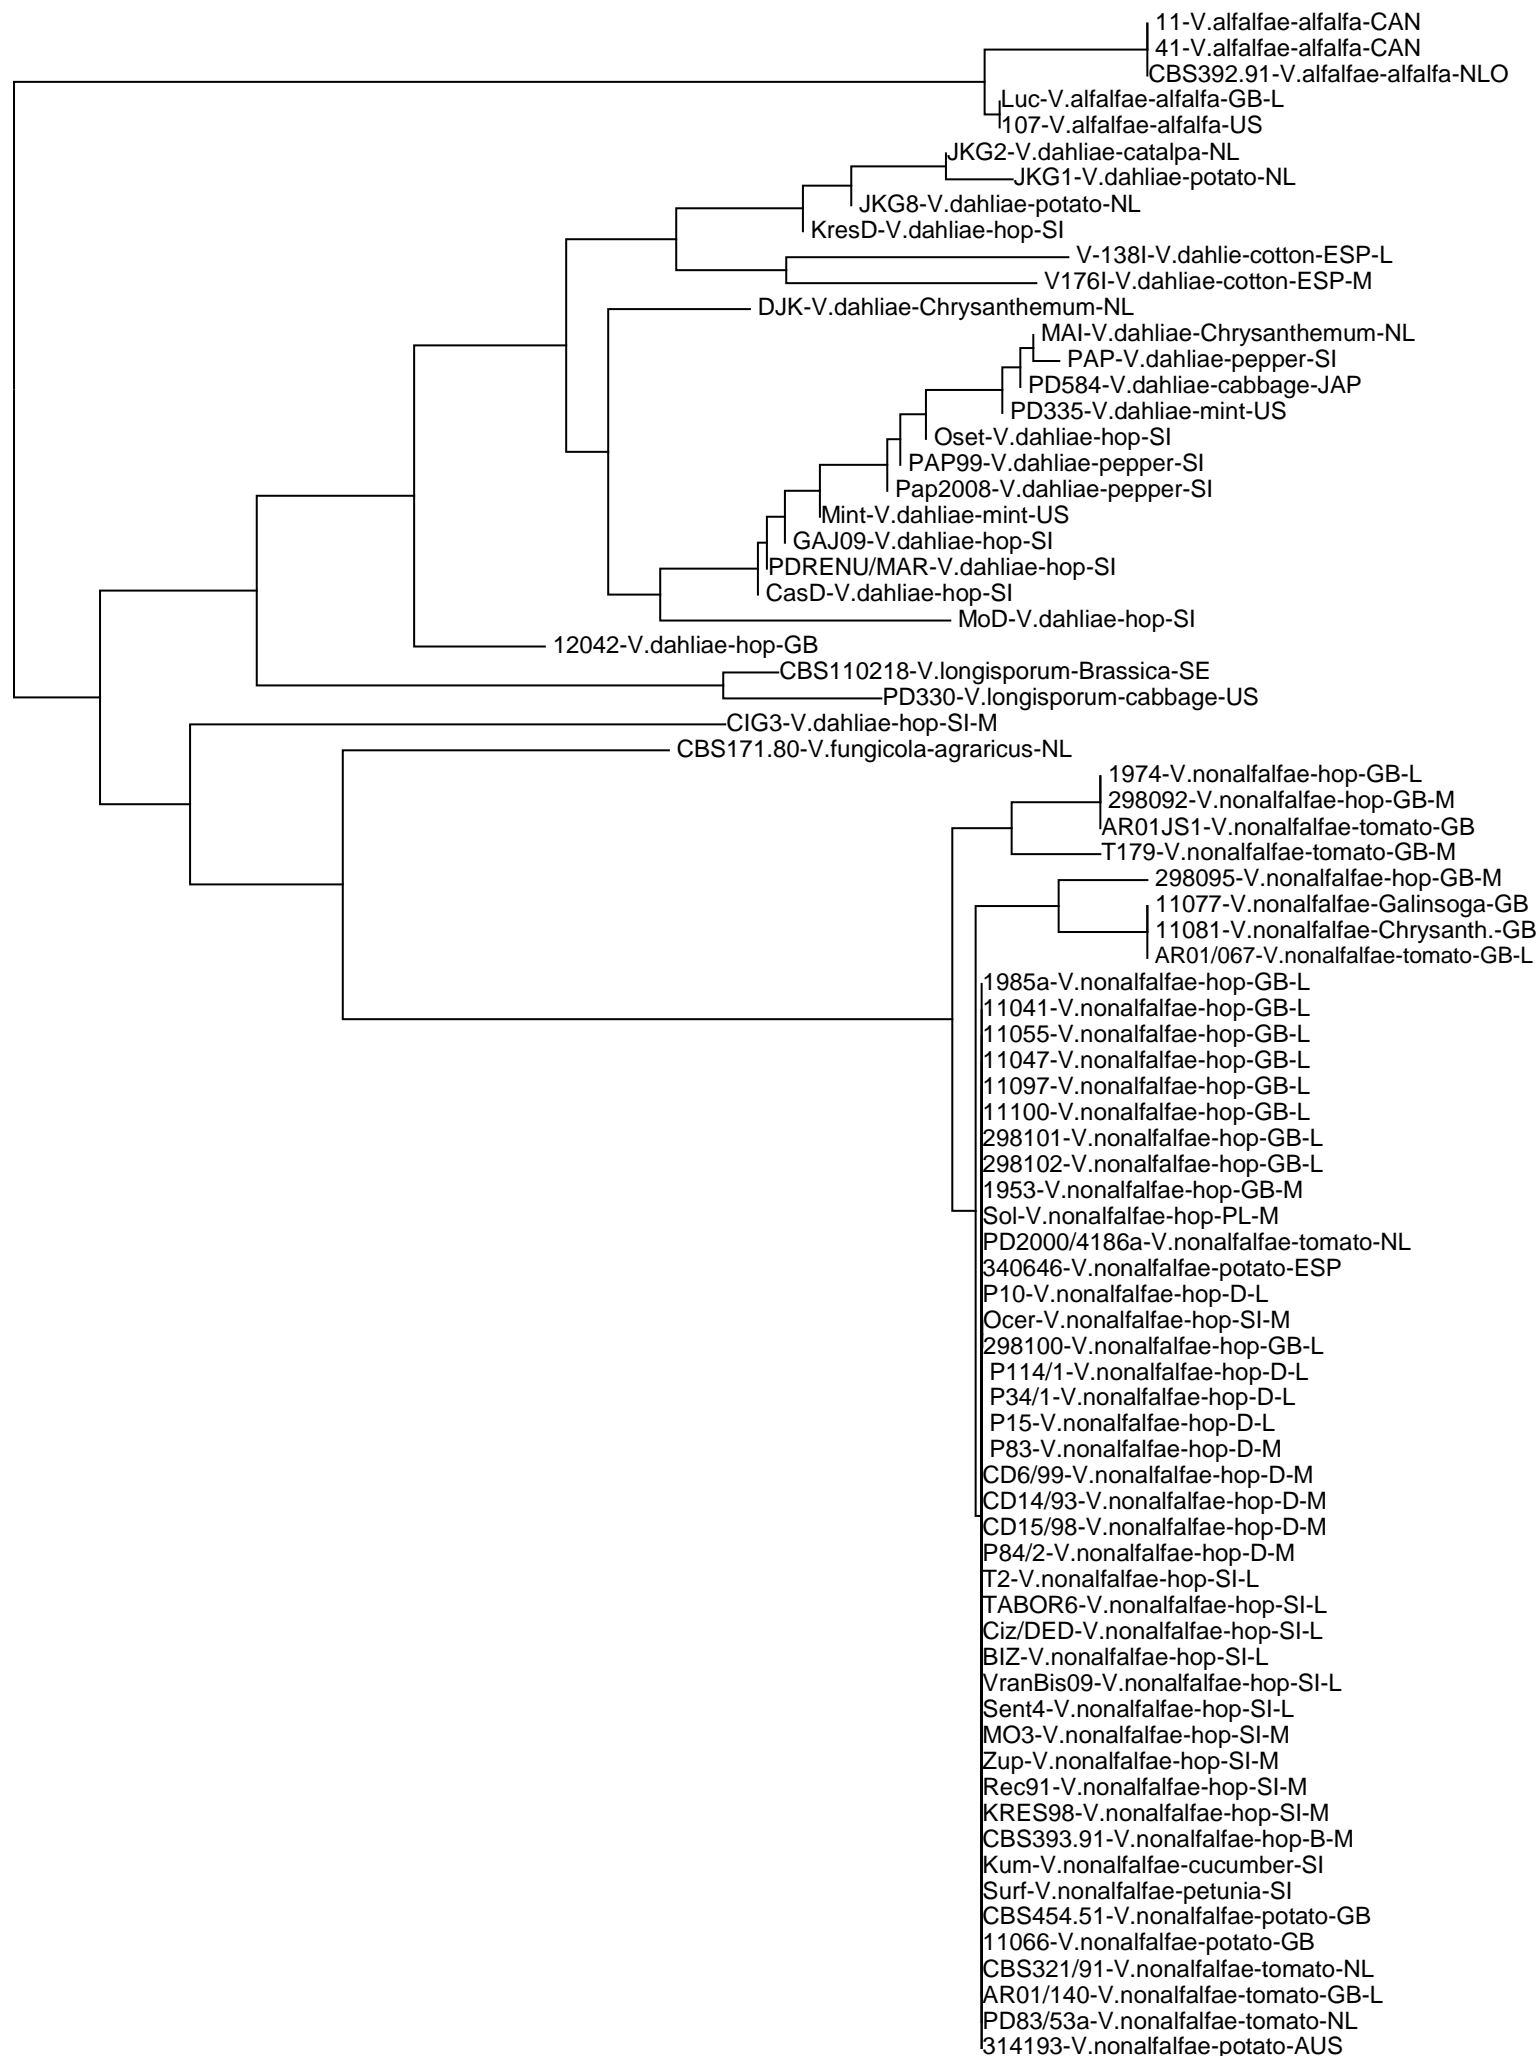

**Figure S1:** SSR marker analysis based phylogenetic tree

Supplement: s1 [file s1]
